# Supplementary material
Source: publisher site journal article supplement (https://www.dovepress.com/article/supplementary_file/589176/Supplementary%20Table%201-4.xlsx)
Supplement: Supplementary file 1 [file Supplementary%20Table%201-4.xlsx]

## Sheet: snps
	Supplementary Table 1:Summary of SNPs and Genetic Effects for Skin Diseases
	Phenotype	SNP	Effect_allele	Other_allele	Chr	Pos	Beta	Se	Pval	F_value
	Papulosquamous Conditions	rs34958906	TA	T	2	61082633	-0.1081	0.019	1.358e-08	1245.8
	Papulosquamous Conditions	rs12188300	T	A	5	158829527	0.3002	0.0407	1.73181e-13	2210.09
	Papulosquamous Conditions	rs3130572	A	C	6	31104702	0.9263	0.0486	0	20074.5
	Papulosquamous Conditions	rs9264277	C	T	6	31224667	0.1452	0.0215	1.57217e-11	1833.59
	Papulosquamous Conditions	rs13210419	A	G	6	31266977	0.8726	0.0425	0	20083.9
	Papulosquamous Conditions	rs34434420	T	G	6	32545279	0.5814	0.1055	3.51002e-08	1243.43
	Papulosquamous Conditions	rs2523815	G	A	6	29840243	0.1704	0.0196	3e-18	3001.65
	Papulosquamous Conditions	rs33980500	T	C	6	111913262	0.2004	0.0362	3.08397e-08	1183.4
	Papulosquamous Conditions	rs60600003	G	T	7	37382465	0.1799	0.031	6.25403e-09	1302.62
	Papulosquamous Conditions	rs181316459	C	G	7	5473610	0.3302	0.0462	8.48203e-13	2178.34
	Papulosquamous Conditions	rs243323	G	A	16	11361202	-0.1141	0.0203	1.98098e-08	1207.03
	Papulosquamous Conditions	rs144651842	A	G	16	27356224	0.2095	0.0351	2.48302e-09	1396.52
	Lichen planus	rs2097431	T	A	6	32590833	0.7015	0.0652	0	41955.3
	Lichen planus	rs28592859	A	G	6	32627072	0.8781	0.0707	0	68733.5
	Lichen planus	rs532086	C	T	6	31881309	0.3245	0.05	8.63973e-11	6660.98
	Psoriatic Arthritis	rs1395621	C	T	1	25270572	0.1585	0.0278	6.48037e-11	335.15
	Psoriatic Arthritis	rs12044149	T	G	1	67600686	0.2369	0.0318	0	590.73
	Psoriatic Arthritis	rs2111485	G	A	2	163110536	0.2214	0.029	0	624.54
	Psoriatic Arthritis	rs62377586	A	G	5	158766022	-0.311	0.0181	0	1156.04
	Psoriatic Arthritis	rs10476295	G	A	5	158841318	-0.1655	0.0216	2.63998e-10	346.11
	Psoriatic Arthritis	rs848	C	A	5	131996500	0.2479	0.0383	9.49e-16	472.61
	Psoriatic Arthritis	rs9264277	C	T	6	31224667	0.432	0.0884	1.33999e-12	2472.02
	Psoriatic Arthritis	rs610604	T	G	6	138199417	-0.141	0.0207	7.75997e-09	233.49
	Psoriatic Arthritis	rs1655901	C	T	6	29916804	0.3389	0.036	0	1548.86
	Psoriatic Arthritis	rs13203895	T	C	6	31244082	0.8451	0.0722	0	5456.01
	Psoriatic Arthritis	rs33980500	T	C	6	111913262	0.5087	0.0643	0	1032.37
	Psoriatic Arthritis	rs9263869	C	T	6	31170014	-0.2179	0.0197	4e-18	556.55
	Psoriatic Arthritis	rs9461806	T	C	6	32710221	0.1778	0.0298	3.59005e-12	412.75
	Psoriatic Arthritis	rs2020854	C	T	12	56743367	-0.3589	0.0322	1.26009e-13	425.87
	Psoriatic Arthritis	rs6505483	G	A	17	26126345	0.1745	0.0285	1.18005e-12	372.59
	Psoriatic Arthritis	rs73510898	A	G	19	10416444	-0.2329	0.0319	2.94002e-08	234.7
	Psoriatic Arthritis	rs34536443	C	G	19	10463118	-0.5362	0.038	1.1601e-14	620.85
	Psoriatic Arthritis	rs5754467	G	A	22	21985094	0.1778	0.0342	1.61002e-09	264.48
	Psoriasis With Arthropathy	rs17728338	A	G	5	150478318	0.3874	0.0704	3.82798e-08	4439.47
	Psoriasis With Arthropathy	rs28752869	T	A	6	31300173	0.7707	0.0454	0	57469.1
	Psoriasis With Arthropathy	rs115174302	T	C	6	28687865	0.3882	0.0628	6.33797e-10	5635.59
	Psoriasis With Arthropathy	rs9281366	TA	T	6	31313269	0.5716	0.0402	0	34454.7
	Psoriasis With Arthropathy	rs2523560	T	C	6	31330844	-0.3091	0.0391	2.899e-15	10727
	Psoriasis Vulgaris	rs12713428	C	A	2	61118113	0.1867	0.0325	9.14892e-09	2836.54
	Psoriasis Vulgaris	rs74817271	A	G	5	150469973	0.3599	0.0547	4.7457e-11	3860.23
	Psoriasis Vulgaris	rs139298380	A	G	5	158718460	0.649	0.0915	1.32587e-12	4890.04
	Psoriasis Vulgaris	rs6556423	T	C	5	158857189	-0.2482	0.0292	1.8e-17	6253.24
	Psoriasis Vulgaris	rs28749130	A	T	6	29907835	0.2928	0.0298	0	8600.04
	Psoriasis Vulgaris	rs16898116	C	T	6	27326792	0.6609	0.1172	1.71799e-08	2935.28
	Psoriasis Vulgaris	rs4947309	G	A	6	31302328	-0.3175	0.0333	0	10907.1
	Psoriasis Vulgaris	rs28752856	G	C	6	31298418	1.036	0.0501	0	57330.7
	Psoriasis Vulgaris	rs28732140	A	G	6	31319606	0.9597	0.0462	0	52535.4
	Psoriasis Vulgaris	rs74630264	A	G	16	27316975	0.2904	0.0518	2.03601e-08	2755.1
	Psoriasis	rs39841	A	G	5	96120170	-0.1624	0.0176	0	-1
	Follicular Cysts Of Skin And Subcutaneous Tissue	rs75495843	A	G	3	38051211	1.1359	0.099	0	14545.9
	Follicular Cysts Of Skin And Subcutaneous Tissue	rs2107595	A	G	7	19049388	0.2017	0.0354	1.262e-08	2758.11
	Follicular Cysts Of Skin And Subcutaneous Tissue	rs112888787	A	G	3	37427243	0.8491	0.1322	1.35201e-10	3993.9
	Psoriasis	rs10888503	T	C	1	152593549	0.1866	0.0171	0	-1
	Psoriasis	rs438650	C	T	1	8290082	0.1244	0.0195	1.76401e-10	-1
	Psoriasis	rs11581607	A	G	1	67707690	-0.3647	0.036	0	-1
	Psoriasis	rs59960858	A	C	1	24519437	-0.2086	0.0243	1.1e-17	-1
	Psoriasis	rs11249215	A	G	1	25297184	0.1403	0.016	2e-18	-1
	Psoriasis	rs12133684	A	G	1	206648995	0.1218	0.0206	3.25702e-09	-1
	Psoriasis	rs35741374	T	C	2	61072567	0.1634	0.0163	0	-1
	Psoriasis	rs2111485	G	A	2	163110536	0.1616	0.0166	0	-1
	Psoriasis	rs771576	C	T	3	101616982	0.1029	0.0169	1.08101e-09	-1
	Psoriasis	rs3906814	G	C	3	17011474	-0.1144	0.0161	1.30407e-12	-1
	Psoriasis	rs6894840	G	T	5	158625788	0.1152	0.0166	3.42295e-12	-1
	Psoriasis	rs1295685	G	A	5	131996445	0.1759	0.0206	1.2e-17	-1
	Psoriasis	rs11135059	A	G	5	158771337	-0.3078	0.0178	0	-1
	Psoriasis	rs115059666	A	G	5	150491845	0.5147	0.0744	4.46684e-12	-1
	Psoriasis	rs12188300	T	A	5	158829527	0.5005	0.0264	0	-1
	Psoriasis	rs9468618	T	C	6	29750776	-0.1856	0.03	6.48605e-10	-1
	Psoriasis	rs9258357	C	T	6	29751129	0.2839	0.0233	0	-1
	Psoriasis	rs9264277	C	T	6	31224667	0.3705	0.018	0	-1
	Psoriasis	rs2735009	A	G	6	29807853	-0.2952	0.0204	0	-1
	Psoriasis	rs12211087	A	T	6	31269946	1.3769	0.0253	0	-1
	Psoriasis	rs28752856	G	C	6	31298418	1.1163	0.0225	0	-1
	Psoriasis	rs1611236	A	G	6	29748690	0.123	0.0172	7.89587e-13	-1
	Psoriasis	rs111818167	CTTT	C	6	31289309	0.6916	0.0202	0	-1
	Psoriasis	rs582757	T	C	6	138197824	-0.1846	0.0176	0	-1
	Psoriasis	rs9504361	G	A	6	577820	-0.1068	0.0164	6.44021e-11	-1
	Psoriasis	rs4712520	C	T	6	20640871	0.1301	0.0212	8.27409e-10	-1
	Psoriasis	rs9277939	A	C	6	33189873	0.228	0.0253	0	-1
	Psoriasis	rs9481169	T	G	6	111929862	0.3716	0.0263	0	-1
	Psoriasis	rs2451258	T	C	6	159506600	-0.0985	0.0169	5.26199e-09	-1
	Psoriasis	rs11767350	G	A	7	37385365	-0.0998	0.0164	1.193e-09	-1
	Psoriasis	rs4978343	T	G	9	110820132	-0.0988	0.0164	1.76701e-09	-1
	Psoriasis	rs9695923	T	C	9	110791067	-0.0955	0.0165	7.08207e-09	-1
	Psoriasis	rs11795343	C	T	9	32523737	-0.1062	0.0164	1.02499e-10	-1
	Psoriasis	rs2675662	G	A	10	75599127	-0.1184	0.0167	1.48799e-12	-1
	Psoriasis	rs1108618	G	A	10	81043743	-0.1098	0.0165	3.24788e-11	-1
	Psoriasis	rs1648153	A	G	11	109959638	-0.1388	0.0164	2.9e-17	-1
	Psoriasis	rs118002009	T	G	11	64122279	-0.102	0.0169	1.61901e-09	-1
	Psoriasis	rs10893884	C	T	11	128410264	-0.106	0.016	3.98658e-11	-1
	Psoriasis	rs2066819	T	C	12	56750204	-0.3283	0.0348	0	-1
	Psoriasis	rs9591325	C	T	13	50811220	-0.19	0.0324	4.49997e-09	-1
	Psoriasis	rs9513593	A	G	13	99950260	-0.1197	0.0205	5.33495e-09	-1
	Psoriasis	rs8016947	G	T	14	35832666	0.1476	0.0162	0	-1
	Psoriasis	rs7141014	C	T	14	98667928	-0.1123	0.0203	3.07496e-08	-1
	Psoriasis	rs28510484	C	G	15	31637569	-0.1398	0.0231	1.37101e-09	-1
	Psoriasis	rs2021511	T	C	16	11344903	-0.1163	0.0181	1.20301e-10	-1
	Psoriasis	rs4889526	A	C	16	31030344	0.1216	0.0165	1.62405e-13	-1
	Psoriasis	rs73986523	C	T	17	40270062	-0.2122	0.038	2.41402e-08	-1
	Psoriasis	rs957970	G	A	17	40519890	0.0929	0.0168	3.05401e-08	-1
	Psoriasis	rs55868394	A	C	17	73851113	0.1389	0.0246	1.70801e-08	-1
	Psoriasis	rs28998802	A	G	17	26124908	0.2113	0.0222	0	-1
	Psoriasis	rs2301368	A	G	17	26130118	0.1073	0.0168	1.60901e-10	-1
	Psoriasis	rs559406	T	G	18	12857002	-0.0924	0.0161	1.01899e-08	-1
	Psoriasis	rs142502677	TTG	T	18	51791307	0.1035	0.0185	2.21998e-08	-1
	Psoriasis	rs11085744	T	C	19	10819967	0.1146	0.0166	5.21315e-12	-1
	Psoriasis	rs2638281	G	A	19	49210869	0.0976	0.0164	2.46297e-09	-1
	Psoriasis	rs34536443	C	G	19	10463118	-0.6799	0.0504	0	-1
	Psoriasis	rs6063454	T	G	20	48590791	-0.1551	0.0166	0	-1
	Psoriasis	rs131656	A	G	22	21917450	0.114	0.0202	1.685e-08	-1

## Sheet: gwas
	Supplementary Table 2:Characteristics of Genome-Wide Association Studies (GWAS) Datasets
	Phenotype	Abbreviation	Data source	SNPs	GWAS ID	Sample size	Ancestry	Case/Control	Year	Sex
	Papulosquamous Conditions	PSC	GWAS	16380466	finn-b-L12_PAPULOSQUAMOUS	218792	European	6550/212242	2021	Males and Females
	Alzheimer's Disease	AD	GWAS	16379428	finn-b-AD_EO_EXMORE	112058	European	587/111471	2021	Males and Females
	Psoriasis Vulgaris	PV	GWAS	16380459	finn-b-L12_PSORI_VULG	215044	European	2802/212242	2021	Males and Females
	Lichen planus	LP	GWAS	16380458	finn-b-L12_LICHENPLANUS	214107	European	1865/212242	2021	Males and Females
	Alzheimer's Disease	AD	GWAS	16380462	finn-b-G6_AD_WIDE	218792	European	5918/212874	2021	Males and Females
	Alzheimer's Disease	AD	GWAS	16380466	finn-b-G6_ALZHEIMER	218792	European	3899/214893	2021	Males and Females
	Follicular Cysts Of Skin And Subcutaneous Tissue	FCST	GWAS	16380459	finn-b-L12_FOLLICULARCYST	213861	European	2722/211139	2021	Males and Females
	Psoriasis With Arthropathy	PsA	GWAS	16380462	finn-b-L12_PSORI_ARTHRO	213879	European	1637/212242	2021	Males and Females
	Psoriasis	Psoriasis	GWAS	8536277	ebi-a-GCST90019016	44161	European	15967/28194	2021
	Alzheimer's Disease	AD	GWAS	7055882	ieu-a-297	54162	European	17008/37154	2013	Males and Females
	Alzheimer's Disease	AD	GWAS	20921626	ebi-a-GCST90027158	487511	European	39106/46828	2022
	Alzheimer's Disease	AD	GWAS	10528610	ieu-b-2	63926	European	21982/41944	2019	Males and Females
	Psoriatic Arthritis	PsA	GWAS		ieu-b-5116	26351	European	5065/21286	2022	Males and Females

## Sheet: random
	Supplementary Table 3:Mendelian Randomization Analysis of Skin Diseases on Alzheimer's Disease
	Exposure	Outcome	Methods	No. of SNPs	The Effect of exposure on outcome OR (95%CI)	P value
	Psoriasis With Arthropathy	Alzheimer's Disease	Inverse variance weighted	4	1.0318 (1.0111,1.0529)	0.00246444
	Psoriasis With Arthropathy	Alzheimer's Disease	MR Egger	4	1.0299 (0.9787,1.0837)	0.374934
	Psoriasis With Arthropathy	Alzheimer's Disease	Weighted median	4	1.0318 (1.0105,1.0534)	0.00319799
	Psoriasis Vulgaris	Alzheimer's Disease	Inverse variance weighted	5	1.1258 (1.0378,1.2212)	0.00431283
	Psoriasis Vulgaris	Alzheimer's Disease	MR Egger	5	1.1097 (0.8944,1.3767)	0.413981
	Psoriasis Vulgaris	Alzheimer's Disease	Weighted median	5	1.1313 (1.0282,1.2448)	0.0113819
	Papulosquamous Conditions	Alzheimer's Disease	Inverse variance weighted	8	1.0459 (1.0124,1.0804)	0.00681626
	Papulosquamous Conditions	Alzheimer's Disease	MR Egger	8	1.0793 (1.0322,1.1285)	0.0153536
	Papulosquamous Conditions	Alzheimer's Disease	Weighted median	8	1.0571 (1.0217,1.0938)	0.00140976
	Lichen planus	Alzheimer's Disease	Inverse variance weighted	3	1.3175 (1.0864,1.5977)	0.00507818
	Lichen planus	Alzheimer's Disease	MR Egger	3	1.5057 (0.9206,2.4628)	0.350253
	Lichen planus	Alzheimer's Disease	Weighted median	3	1.3303 (1.0685,1.6562)	0.0106877
	Psoriatic Arthritis	Alzheimer's Disease	Inverse variance weighted	18	1.0528 (1.0096,1.0979)	0.0161605
	Psoriatic Arthritis	Alzheimer's Disease	MR Egger	18	1.0125 (0.9244,1.109)	0.791923
	Psoriatic Arthritis	Alzheimer's Disease	Weighted median	18	1.0278 (0.9685,1.0907)	0.365339
	Follicular Cysts Of Skin And Subcutaneous Tissue	Alzheimer's Disease	Inverse variance weighted	3	1.0665 (1.0009,1.1365)	0.0469392
	Follicular Cysts Of Skin And Subcutaneous Tissue	Alzheimer's Disease	MR Egger	3	1.0899 (0.9911,1.1985)	0.32643
	Follicular Cysts Of Skin And Subcutaneous Tissue	Alzheimer's Disease	Weighted median	3	1.0647 (0.9943,1.1402)	0.0725898
	Psoriasis	Alzheimer's Disease	Inverse variance weighted	47	1.0719 (1.018,1.1286)	0.00832736
	Psoriasis	Alzheimer's Disease	MR Egger	47	1.045 (0.9196,1.1874)	0.503473
	Psoriasis	Alzheimer's Disease	Weighted median	47	1.084 (1.0043,1.1701)	0.0383571

## Sheet: sensitivity
	Supplementary Table 4:Sensitivity Analysis and Heterogeneity Tests in Mendelian Randomization
	Exposure	Outcome	Intercept(MR-Egger intercept)	SE(MR-Egger intercept)	P value(MR-Egger intercept)	Cochran's Q(Cochran’s Q test)	Q_df(Cochran’s Q test)	P value(Cochran’s Q test)
	Psoriasis	Alzheimer's Disease	0.0045	0.0106	0.671659	40.2929	46	0.709266
	Follicular Cysts Of Skin And Subcutaneous Tissue	Alzheimer's Disease	-0.0153	0.0254	0.655265	1.2234	2	0.542416
	Lichen planus	Alzheimer's Disease	-0.0879	0.152	0.666204	0.7047	2	0.703039
	Papulosquamous Conditions	Alzheimer's Disease	-0.0116	0.0063	0.117981	8.7304	7	0.272597
	Psoriasis With Arthropathy	Alzheimer's Disease	0.0011	0.0139	0.944076	1.926	3	0.587909
	Psoriasis Vulgaris	Alzheimer's Disease	0.0043	0.0305	0.896562	0.703	4	0.950954
	Psoriatic Arthritis	Alzheimer's Disease	0.0127	0.0134	0.357723	18.4166	17	0.363027
